# Supplementary material for: Construction of copper chains with new fluorescent guanidino-functionalized naphthyridine ligands
Source: Royal Society of Chemistry journal article supplement (doi:10.1039/c6dt03166h), 2016-01-01
Supplement: c6dt03166h1.pdf [file c6dt03166h1.pdf]

## Supporting Information

### **Construction of Copper Chains with New Fluorescent Guanidino- Functionalized Naphthyridine Ligands**

Christoph Krämer, Simone Leingang, Olaf Hübner, Elisabeth Kaifer, Hubert Wadepohl,  
Hans-Jörg Himmel\*

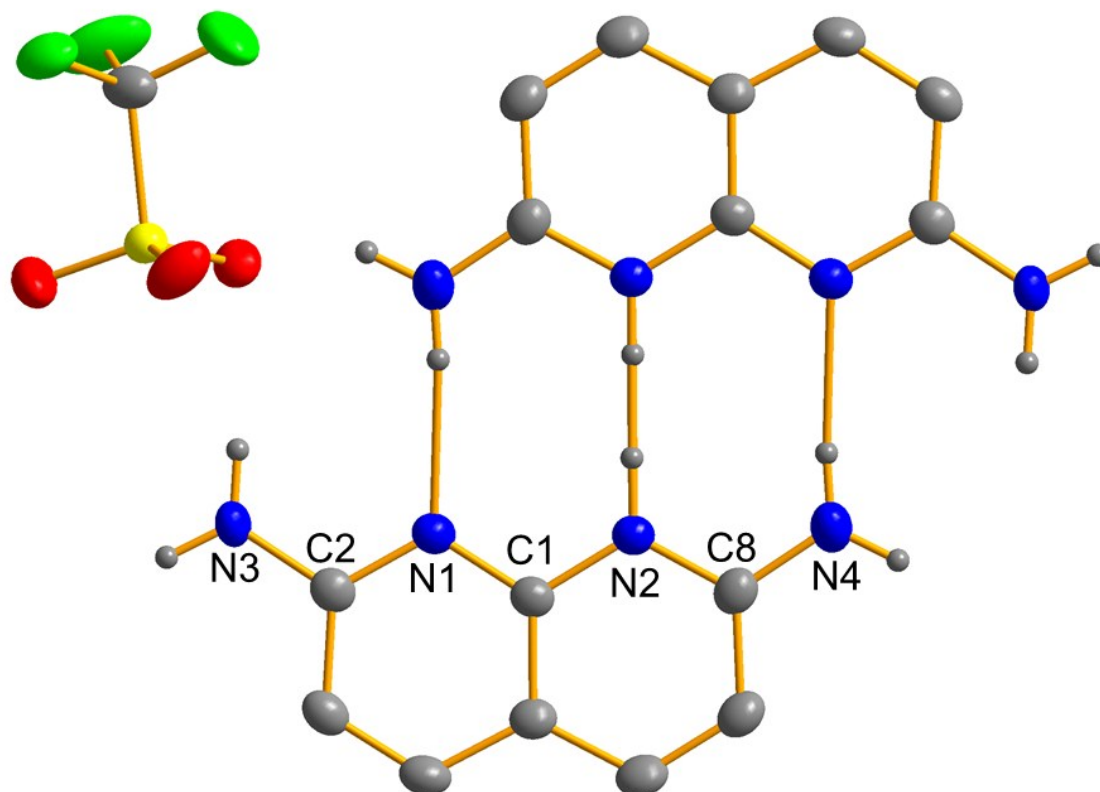

**Fig. S1** Hydrogen-bonded dimer of the protonated amino precursor to the guanidino ligands. A double-potential minimum exists with the proton on one or the other molecule. Hydrogen atoms attached to carbon omitted for clarity. Vibrational ellipsoids drawn at the 50% probability level. Selected bond distances (in Å): N1-C1 1.355(2), N1-C2 1.338(2), N2-C1 1.373(2), N2-C8 1.349(2), N3-C2 1.383(2), N4-C8 1.331(2), N1 $\cdots$ N4' 2.883(1), N2 $\cdots$ N2' 2.995(1).

## UV/Vis

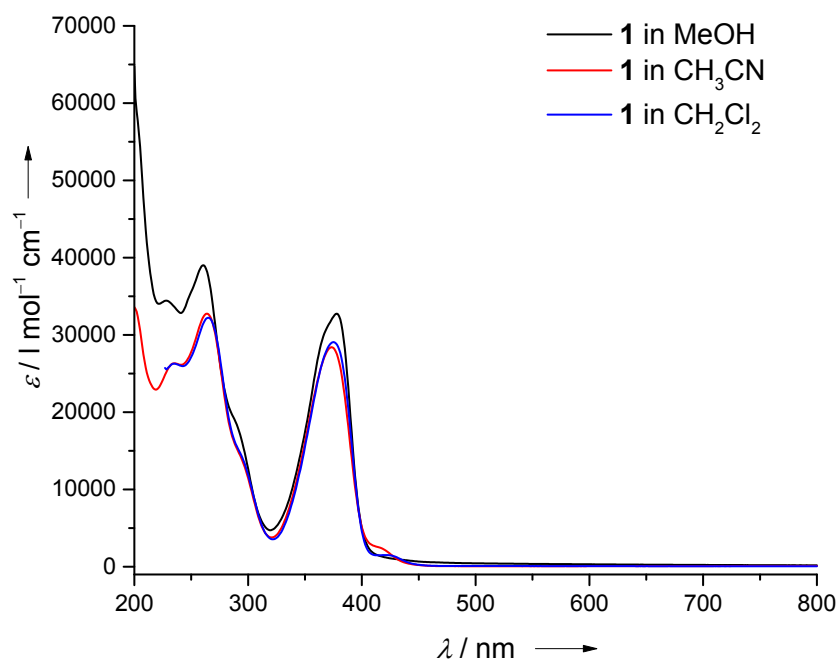

**Fig. S2** Comparison of the UV/Vis spectrum of **1** in different solvents ( $c = 2.0 \cdot 10^{-5} \text{ mol l}^{-1}$ ).

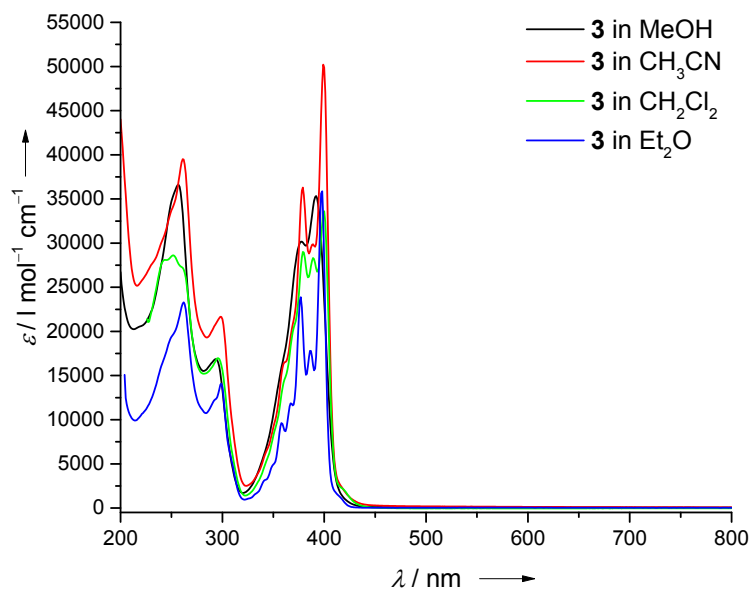

**Fig. S3** Comparison of the UV/Vis spectrum of **3** in different solvents ( $c = 2.0 \cdot 10^{-5} \text{ mol l}^{-1}$ ).

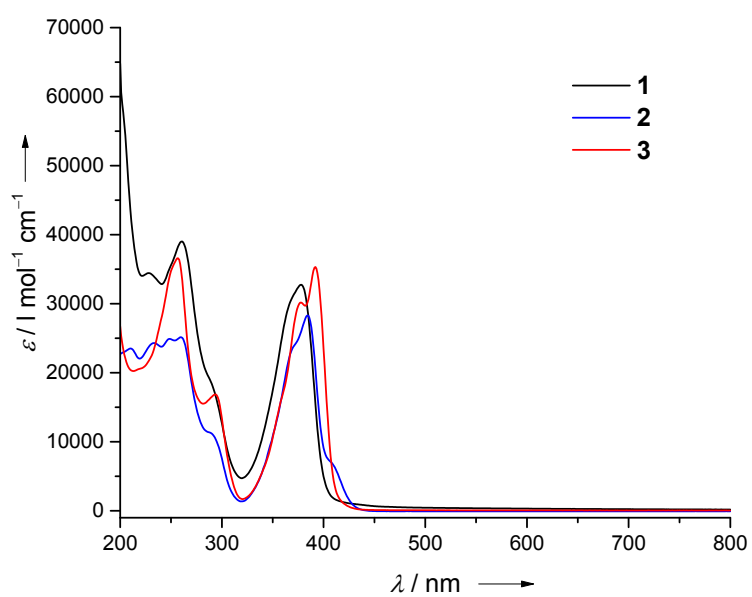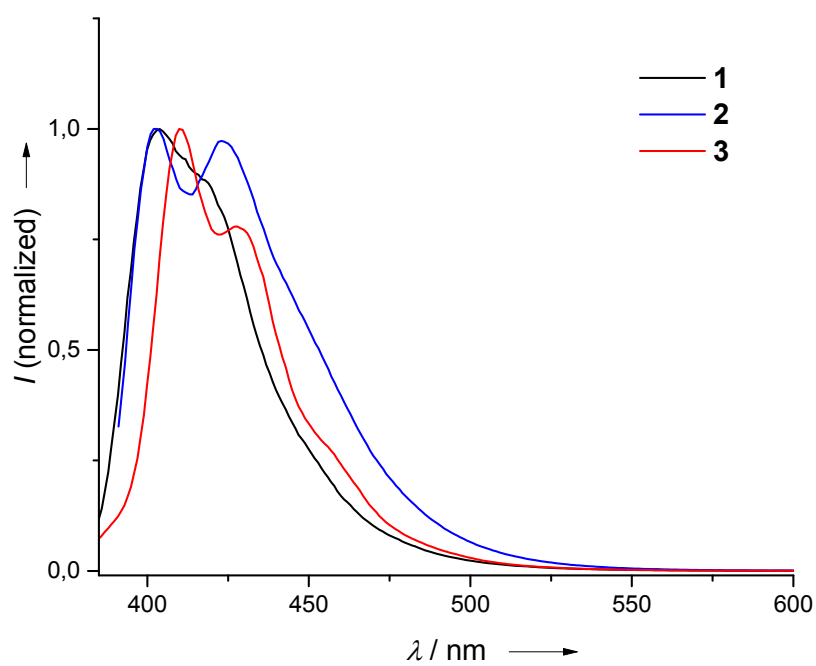

**Fig. S4** Top: UV/Vis spectra of **1**, **2** and **3** in CH<sub>3</sub>OH ( $c = 2.0 \cdot 10^{-5}$  mol l<sup>-1</sup>). Bottom: Normalized emission spectra of **1**, **2** and **3** in CH<sub>3</sub>OH ( $c = 2.0 \cdot 10^{-5}$  mol l<sup>-1</sup>).

## CV measurements

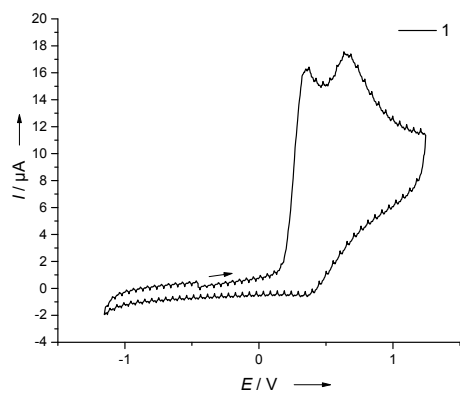

**Fig. S5** CV of **1** (potential vs Fc/Fc<sup>+</sup>, CH<sub>2</sub>Cl<sub>2</sub> solution, with [n-Bu<sub>4</sub>N][PF<sub>6</sub>] as supporting electrolyte, scan speed of 100 mV s<sup>-1</sup>).

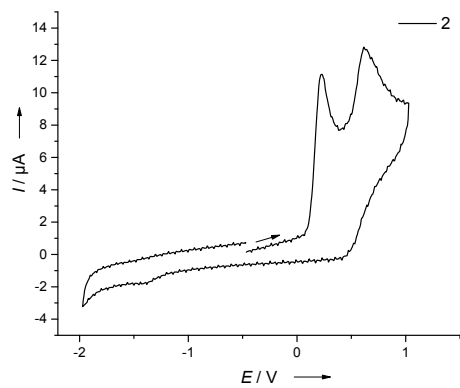

**Fig. S6** CV of **2** (potential vs Fc/Fc<sup>+</sup>, CH<sub>2</sub>Cl<sub>2</sub> solution, with [n-Bu<sub>4</sub>N][PF<sub>6</sub>] as supporting electrolyte, scan speed of 100 mV s<sup>-1</sup>).

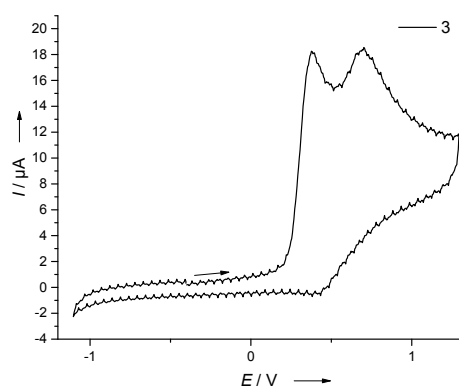

**Fig. S7** CV of **3** (potential vs Fc/Fc<sup>+</sup>, CH<sub>2</sub>Cl<sub>2</sub> solution, with [*n*-Bu<sub>4</sub>N][PF<sub>6</sub>] as supporting electrolyte, scan speed of 100 mV s<sup>-1</sup>).

NMR

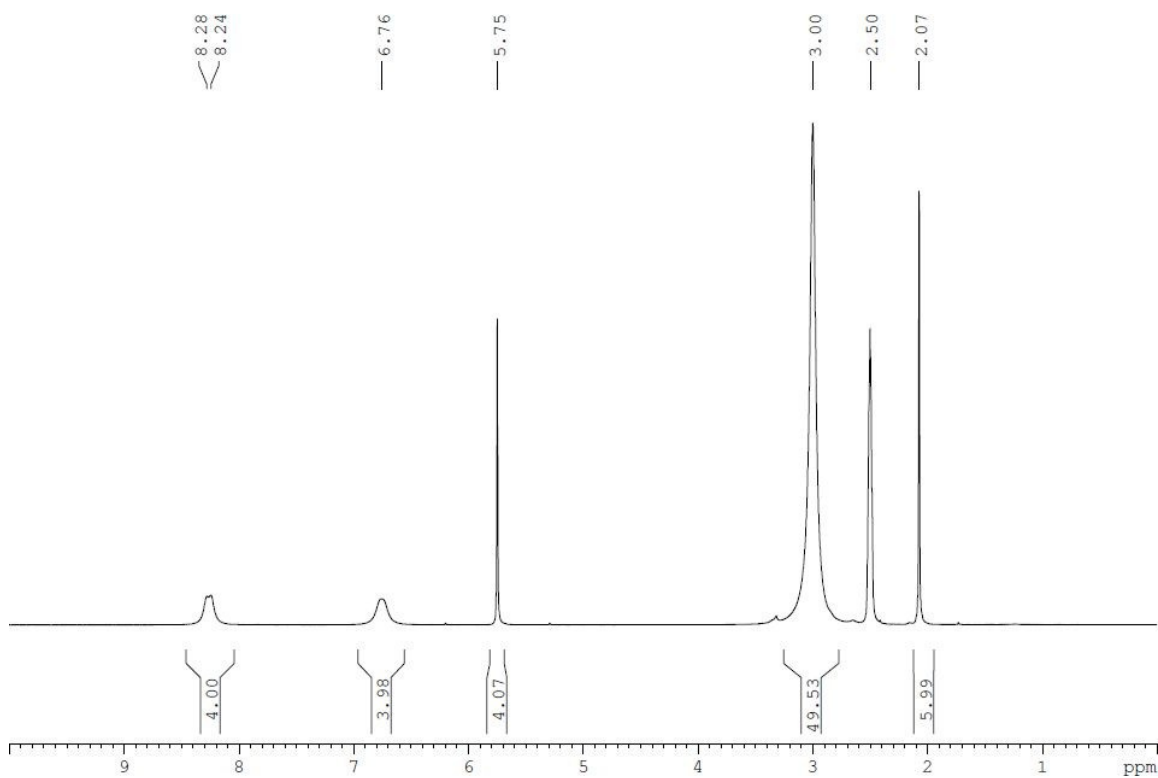

**Fig. S8** <sup>1</sup>H NMR (199.87 MHz, 298.0 K) spectrum of [Cu<sub>4</sub>(**1**)<sub>2</sub>](BF<sub>4</sub>)<sub>4</sub>·2CH<sub>3</sub>CN in *d*<sub>6</sub>-DMSO, showing the presence of uncoordinated CH<sub>3</sub>CN molecules (signal at δ = 2.07 ppm).

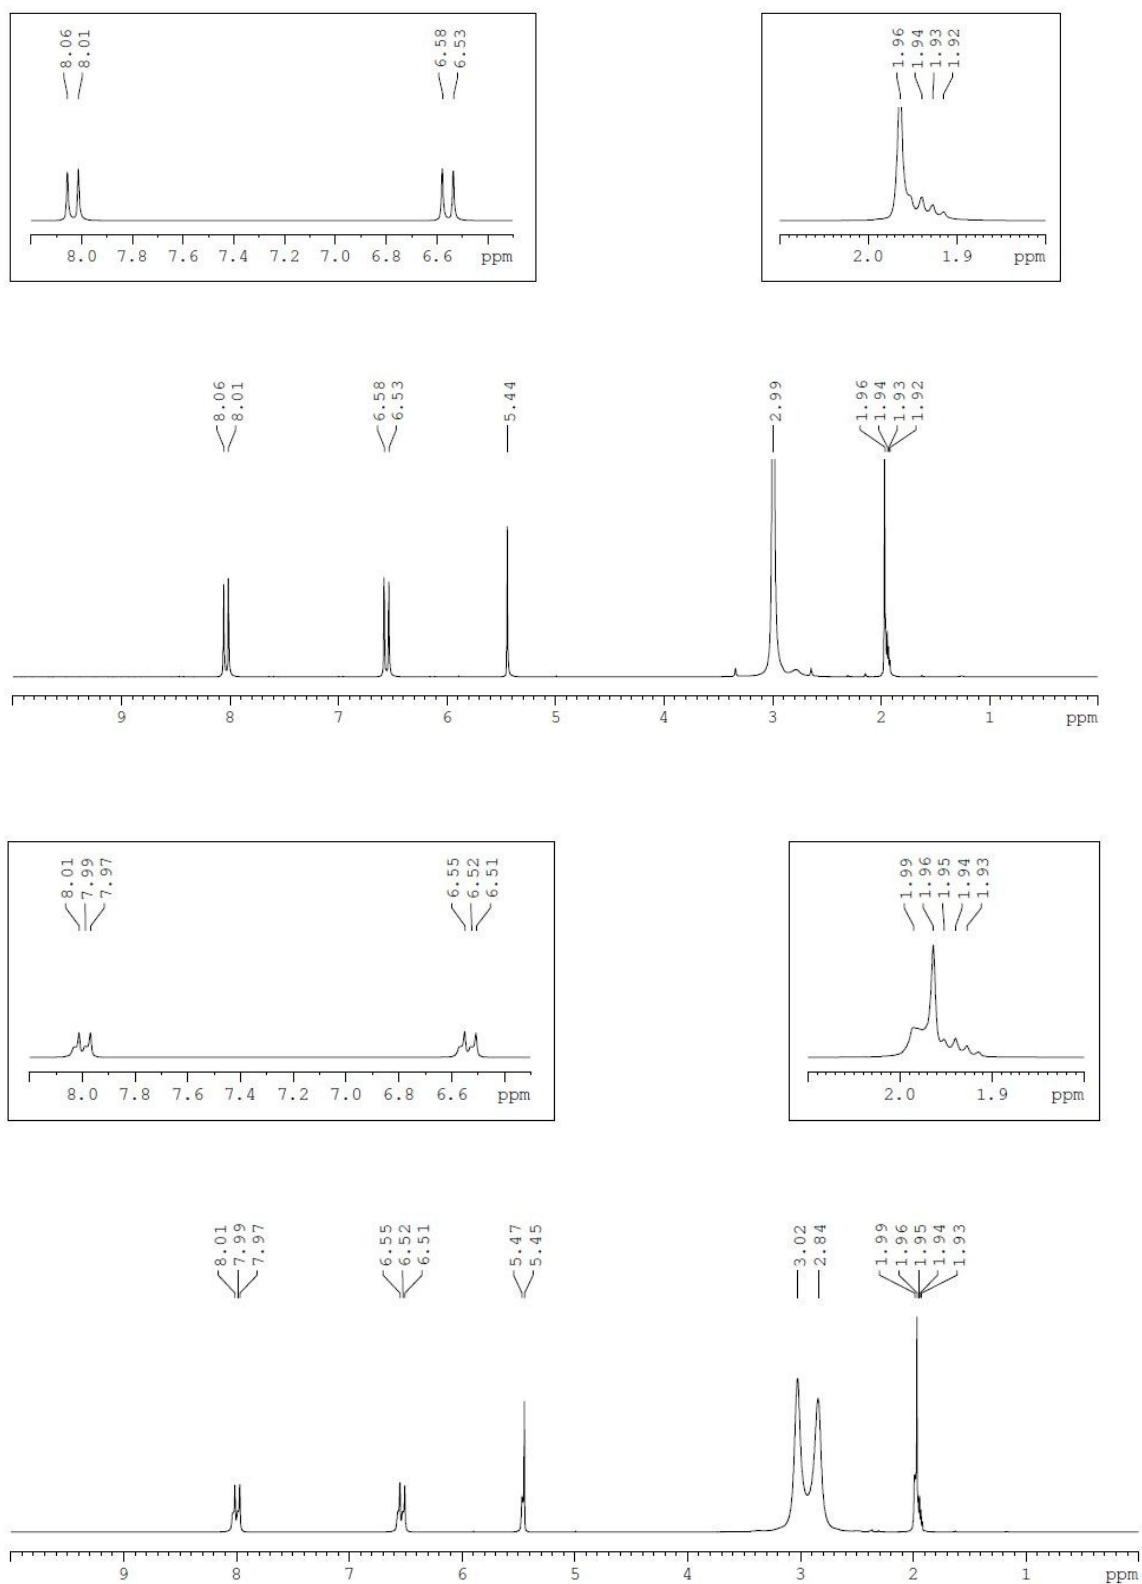

**Fig. S9**  $^1\text{H}$  NMR (199.87 MHz) spectra of  $[\text{Cu}_4(\mathbf{1})_2](\text{BF}_4)_4 \cdot 2\text{CH}_3\text{CN}$  in  $\text{CD}_3\text{CN}$  at  $25\text{ }^\circ\text{C}$  (top) and  $-35\text{ }^\circ\text{C}$  (bottom), indicating coordination of  $\text{CH}_3\text{CN}$  molecules at low temperature.

## Experimental details

### I) Substitution of CH<sub>3</sub>CN in [Cu<sub>4</sub>(**1**)<sub>2</sub>](BF<sub>4</sub>)<sub>4</sub>·2CH<sub>3</sub>CN

a) 7.30 mg (0.06 mmol, 4.0 eq) 4-(dimethylamino)pyridine was added to a solution of 20.0 mg (0.02 mmol, 1.0 eq) [Cu<sub>4</sub>(**1**)<sub>2</sub>](BF<sub>4</sub>)<sub>4</sub>·2CH<sub>3</sub>CN in 4 ml CH<sub>3</sub>CN. The solution was stirred for 3 d at room temperature. Then, the solvent was removed in vacuo and a brown solid was obtained. No reaction could be observed by <sup>1</sup>H NMR and MS.

b) 3.72 mg (0.03, 2.0 eq) 2-nitropyridine was added to a solution of 20.0 mg (0.02 mmol, 1.0 eq) [Cu<sub>4</sub>(**1**)<sub>2</sub>](BF<sub>4</sub>)<sub>4</sub>·2CH<sub>3</sub>CN in 4 ml CH<sub>3</sub>CN. After the solution was stirred for 1h at room temperature, the solvent was removed. As <sup>1</sup>H NMR showed that no reaction took place, the solid was redissolved in CH<sub>3</sub>CN and the solution was heated at reflux for 3 h. Analytical data showed that no reaction occurred.

c) 34.5 mg (0.02 mmol, 1.0 eq) [Cu<sub>4</sub>(**1**)<sub>2</sub>](BF<sub>4</sub>)<sub>4</sub>·2CH<sub>3</sub>CN was dissolved in 3 ml benzonitrile. The solution was stirred for 3 d at room temperature. Then, the excess of benzonitrile was removed under reduced pressure. The resulting yellow solid was washed with hexane (3x5 ml) and redissolved in 10 ml CH<sub>2</sub>Cl<sub>2</sub>, insoluble solid was filtered off. The insoluble solid was identified as [Cu<sub>4</sub>(**1**)<sub>2</sub>](BF<sub>4</sub>)<sub>4</sub>·2CH<sub>3</sub>CN by <sup>1</sup>H-NMR. X-Ray structure analysis of the crystals obtained from CH<sub>2</sub>Cl<sub>2</sub> solution revealed a mixture of [Cu<sub>4</sub>(**1**)<sub>2</sub>(CH<sub>2</sub>Cl<sub>2</sub>)<sub>2</sub>](BF<sub>4</sub>)<sub>4</sub>, [Cu<sub>4</sub>(**1**)<sub>2</sub>](BF<sub>4</sub>)<sub>4</sub> and [Cu<sub>4</sub>(**1**)<sub>2</sub>(CuCl<sub>2</sub>)<sub>2</sub>](BF<sub>4</sub>)<sub>2</sub> (see Fig. S11). Crystal data for [Cu<sub>4</sub>(**1**)<sub>2</sub>(CH<sub>2</sub>Cl<sub>2</sub>)<sub>2</sub>](BF<sub>4</sub>)<sub>4</sub>, [Cu<sub>4</sub>(**1**)<sub>2</sub>](BF<sub>4</sub>)<sub>4</sub>, [Cu<sub>4</sub>(**1**)<sub>2</sub>(CuCl<sub>2</sub>)<sub>2</sub>](BF<sub>4</sub>)<sub>2</sub>, C<sub>110</sub>H<sub>172</sub>B<sub>10</sub>Cl<sub>8</sub>Cu<sub>14</sub>F<sub>40</sub>N<sub>48</sub>·6CH<sub>2</sub>Cl<sub>2</sub>: *M*<sub>r</sub> = 4717.76, 0.10 x 0.08 x 0.06 mm<sup>3</sup>, triclinic, space group *P* $\bar{1}$ , *a* = 12.7803(3), *b* = 15.1583(4), *c* = 23.8968(6) Å, *α* = 100.103(2)°, *β* = 100.290(2)°, *γ* = 91.496(2)°, *V* = 4476.5(2) Å<sup>3</sup>, *Z* = 1, *d*<sub>calc</sub> = 1.750 Mg·m<sup>-3</sup>, Mo *K*<sub>α</sub> radiation (*λ* = 0.71073 Å), *μ* = 2.024 mm<sup>-1</sup>, *T* = 120(1) K, *θ*-range 3.2 to 26.4°. Reflections measd. 165973, indep. 18252 [*R*<sub>int</sub> = 0.0833], obs. 14220. Final *R* indices [*I* > 2σ(*I*): *R*(*F*) = 0.0486, *wR*(*F*<sup>2</sup>) = 0.1096, *Goof* = 1.021.



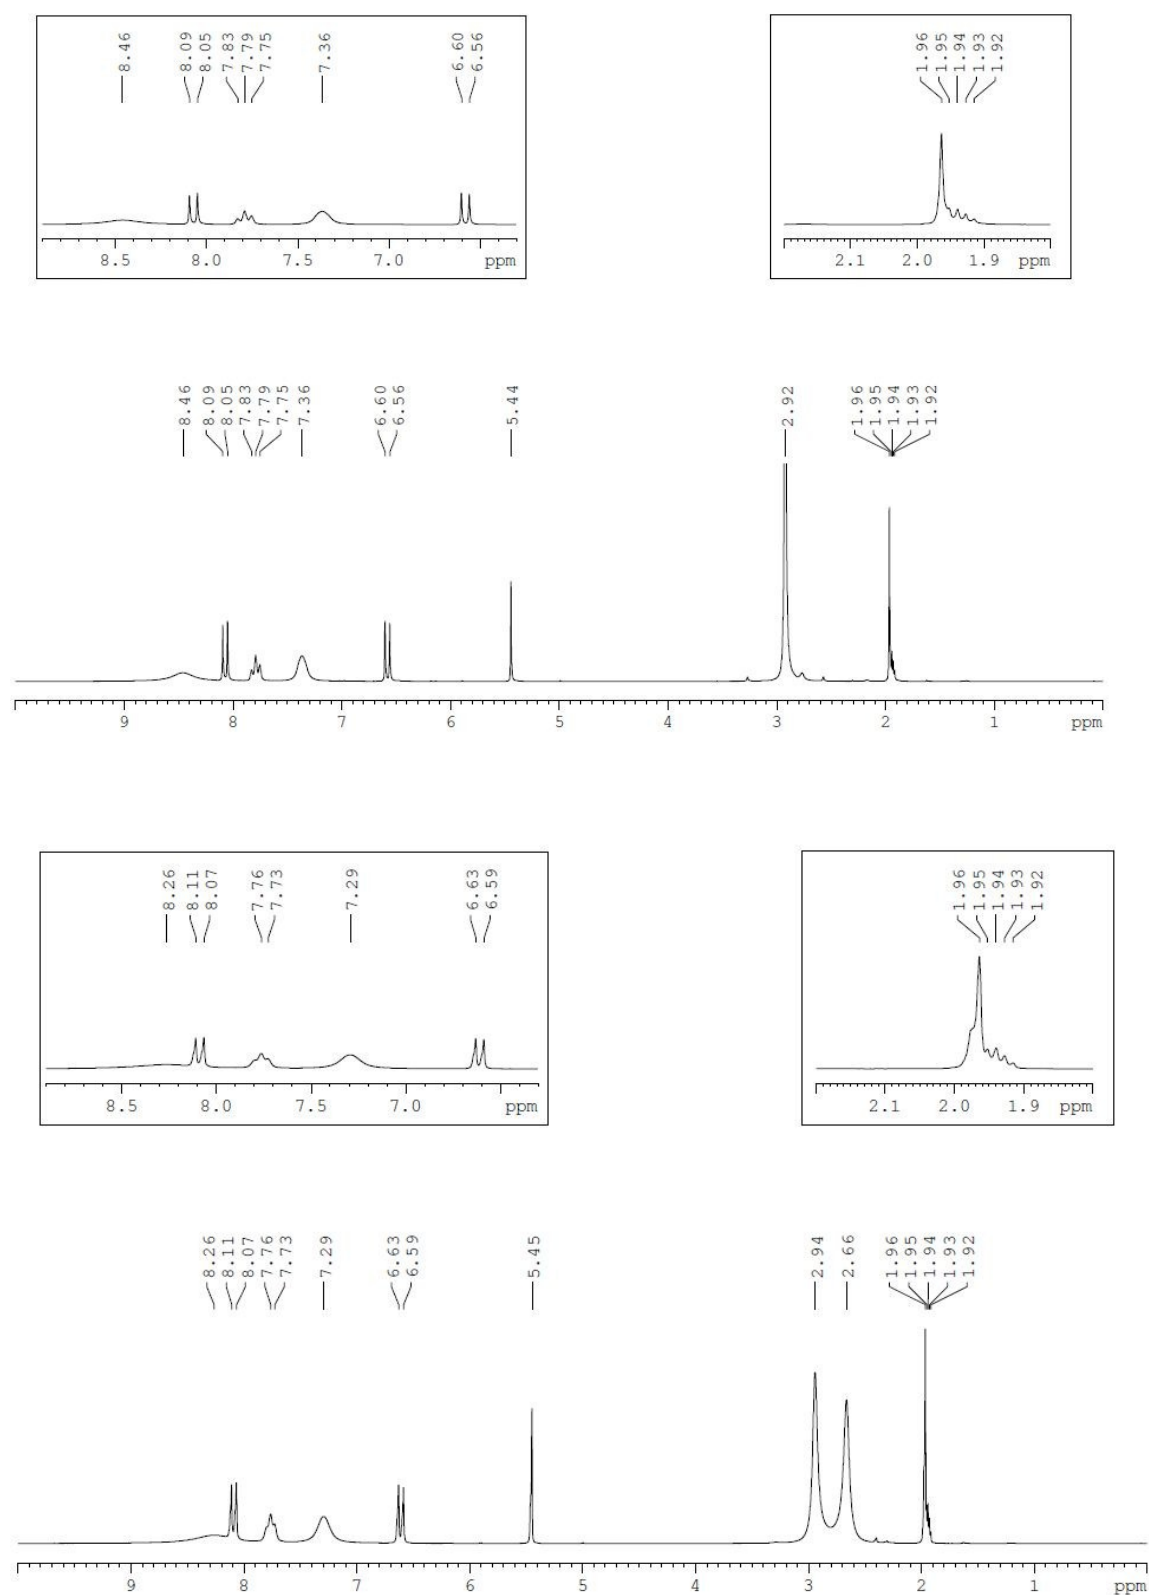

**Fig. S10**  $^1\text{H}$  NMR (199.87 MHz) spectra of  $[\text{Cu}_4(\mathbf{1})_2](\text{BF}_4)_4 \cdot 2\text{CH}_3\text{CN}$  in the presence of 2 equivalents pyridine in  $\text{CD}_3\text{CN}$  at 25 °C (top) and -35 °C (bottom).

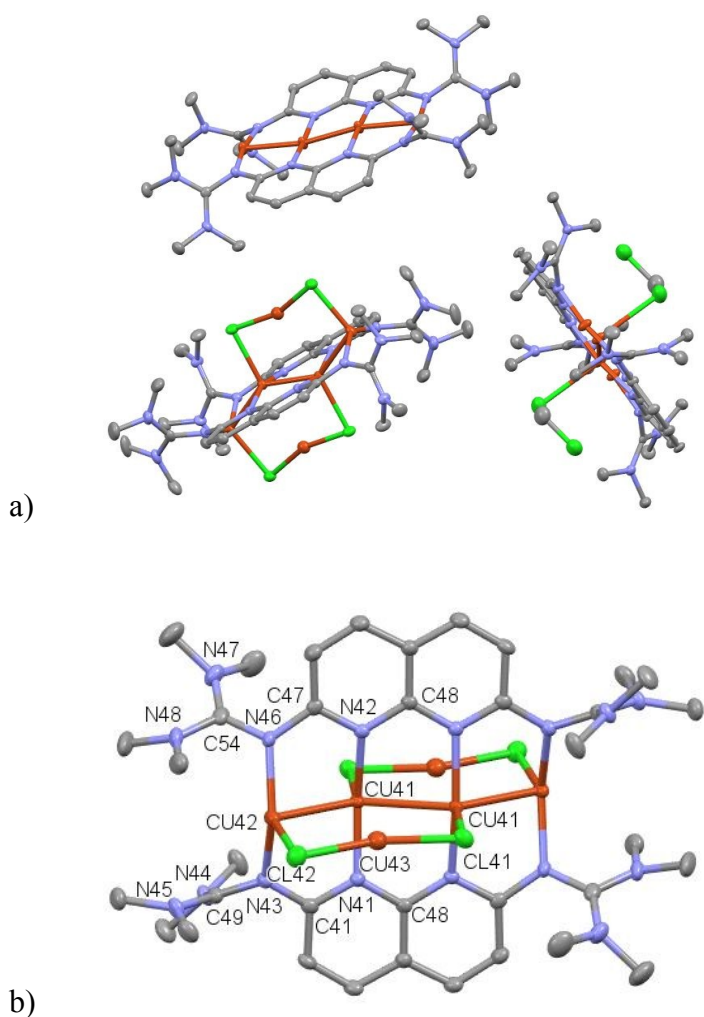

**Fig. S11** Molecular structure of  $[\text{Cu}_4(\mathbf{1})_2(\text{CuCl}_2)_2](\text{BF}_4)_2$ ,  $[\text{Cu}_4(\mathbf{1})_2](\text{BF}_4)_4$  and  $[\text{Cu}_4(\mathbf{1})_2(\text{CH}_2\text{Cl}_2)_2](\text{BF}_4)_4$ .  $\text{BF}_4^-$  anions, solvent molecules and hydrogen atoms attached to carbon omitted for clarity. Vibrational ellipsoids drawn at the 50% probability level. Selected bond distances (in Å) and angles (in °):

a) View of the unit cell containing the three complexes  $[\text{Cu}_4(\mathbf{1})_2(\text{CuCl}_2)_2]^{2+}$ ,  $[\text{Cu}_4(\mathbf{1})_2]^{4+}$  and  $[\text{Cu}_4(\mathbf{1})_2(\text{CH}_2\text{Cl}_2)_2]^{4+}$ .

b) Structure of  $[\text{Cu}_4(\mathbf{1})_2(\text{CuCl}_2)_2](\text{BF}_4)_2$ :  $\text{Cu41}\cdots\text{Cu41}'$  2.4520(9),  $\text{Cu41}\cdots\text{Cu42}$  2.4855(7),  $\text{Cu41}\cdots\text{Cu43}$  2.9358(7),  $\text{Cu41}-\text{Cl41}'$  2.4732(11),  $\text{Cu42}-\text{Cl42}$  2.4057(11),  $\text{Cu43}-\text{Cl41}$  2.1301(12),  $\text{Cu43}-\text{Cl42}$  2.1316(12),  $\text{Cu41}-\text{N41}$  1.955(3),  $\text{Cu41}-\text{N42}$  1.958(3),  $\text{Cu42}-\text{N43}$  1.949(3),  $\text{Cu42}-\text{N46}$  1.949(3),  $\text{N41}-\text{C41}$  1.350(5),  $\text{N41}-\text{C48}$  1.369(5),  $\text{N42}-\text{C47}$  1.346(5),  $\text{N42}-\text{C48}'$  1.369(5),  $\text{N43}-\text{C41}$  1.363(5),  $\text{N43}-\text{C49}$  1.369(5),  $\text{N44}-\text{C49}$  1.337(5),  $\text{N45}-\text{C49}$  1.335(5),  $\text{N46}-\text{C47}$  1.373(5),  $\text{N46}-\text{C54}$  1.341(5),  $\text{N47}-\text{C54}$  1.342(6),  $\text{N48}-\text{C54}$  1.355(6),  $\text{Cu41}'\cdots\text{Cu41}\cdots\text{Cu42}$  139.44(3),  $\text{Cu43}-\text{Cl41}-\text{Cu41}'$  87.58(4),  $\text{Cu43}-\text{Cl42}-\text{Cu42}$  83.51(4),  $\text{Cl41}-\text{Cu43}-\text{Cl42}$  161.04(5),  $\text{N41}-\text{Cu41}-\text{N42}$  161.42(13),  $\text{N46}-\text{Cu42}-\text{N43}$  140.25(14).

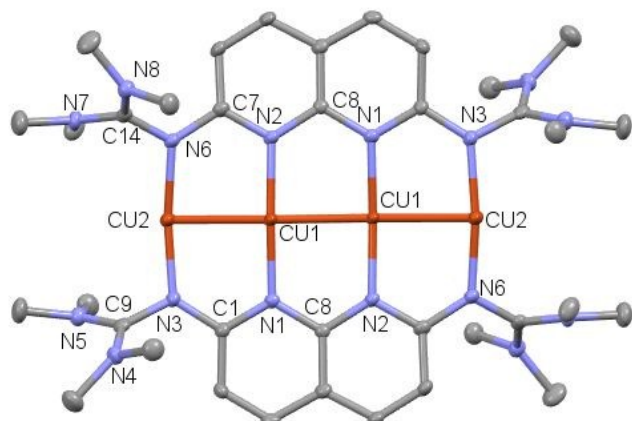

c)

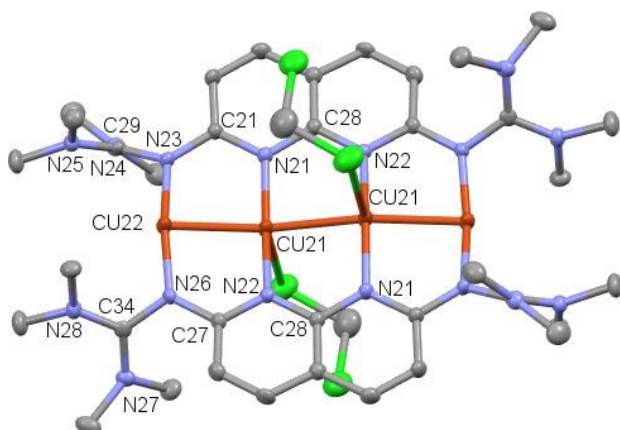

d)

c) Structure of  $[\text{Cu}_4(\mathbf{1})_2](\text{BF}_4)_4$ :  $\text{Cu1}\cdots\text{Cu1}'$  2.4162(9),  $\text{Cu1}\cdots\text{Cu2}$  2.4255(7),  $\text{Cu1-N1}$  1.921(3),  $\text{Cu1-N2}$  1.917(3),  $\text{Cu2-N3}$  1.869(3),  $\text{Cu2-N6}$  1.866(3),  $\text{N1-C1}$  1.351(5),  $\text{N1-C8}$  1.375(5),  $\text{N2-C7}$  1.355(5),  $\text{N2-C8}$  1.372(5),  $\text{N3-C1}$  1.368(5),  $\text{N3-C9}$  1.377(5),  $\text{N4-C9}$  1.326(5),  $\text{N5-C9}$  1.341(5),  $\text{N6-C7}$  1.374(5),  $\text{N6-C14}$  1.367(5),  $\text{N7-C14}$  1.340(5),  $\text{N8-C14}$  1.331(5),  $\text{Cu1}'\cdots\text{Cu1}\cdots\text{Cu2}$  168.69(4),  $\text{N1}'\text{-Cu1-N2}$  173.44(14),  $\text{N6-Cu2-N3}'$  170.52(14).

d) Structure of  $[\text{Cu}_4(\mathbf{1})_2(\text{CH}_2\text{Cl}_2)_2](\text{BF}_4)_4$ :  $\text{Cu21}\cdots\text{Cu21}'$  2.4087(10),  $\text{Cu21}\cdots\text{Cu22}$  2.4187(7),  $\text{Cu21-N21}'$  1.937(3),  $\text{Cu21-N22}$  1.931(3),  $\text{Cu22-N23}'$  1.867(3),  $\text{Cu22-N26}$  1.868(3),  $\text{N21-C21}'$  1.356(5),  $\text{N21-C28}$  1.372(5),  $\text{N22-C27}$  1.350(5),  $\text{N22-C28}$  1.376(5),  $\text{N23-C21}$  1.363(5),  $\text{N23-C29}$  1.373(5),  $\text{N24-C29}$  1.330(5),  $\text{N25-C29}$  1.333(5),  $\text{N26-C27}$  1.367(5),  $\text{N26-C34}$  1.370(5),  $\text{N27-C34}$  1.333(5),  $\text{N28-C34}$  1.334(5),  $\text{Cu21}'\cdots\text{Cu21}\cdots\text{Cu22}$  165.13(4),  $\text{N21}'\text{-Cu21-N22}$  171.79(15),  $\text{N26-Cu22-N23}'$  169.61(14).

## Experimental details

II) Reaction of  $[\text{Cu}_4(\mathbf{1})_2](\text{BF}_4)_4 \cdot 2\text{CH}_3\text{CN}$  with bis(triphenylphosphoranylidene)ammonium chloride (PPNCl)

23.6 mg (0.02 mmol, 1.0 eq) of  $[\text{Cu}_4(\mathbf{1})_2](\text{BF}_4)_4 \cdot 2\text{CH}_3\text{CN}$  and 19.4 mg of PPNCl were dissolved in 5 ml  $\text{CH}_3\text{CN}$ . The solution was stirred for 2 h at room temperature. No reaction was observed in the  $^1\text{H}$  NMR spectrum (see Fig. S14) and with ESI<sup>+</sup>-MS.

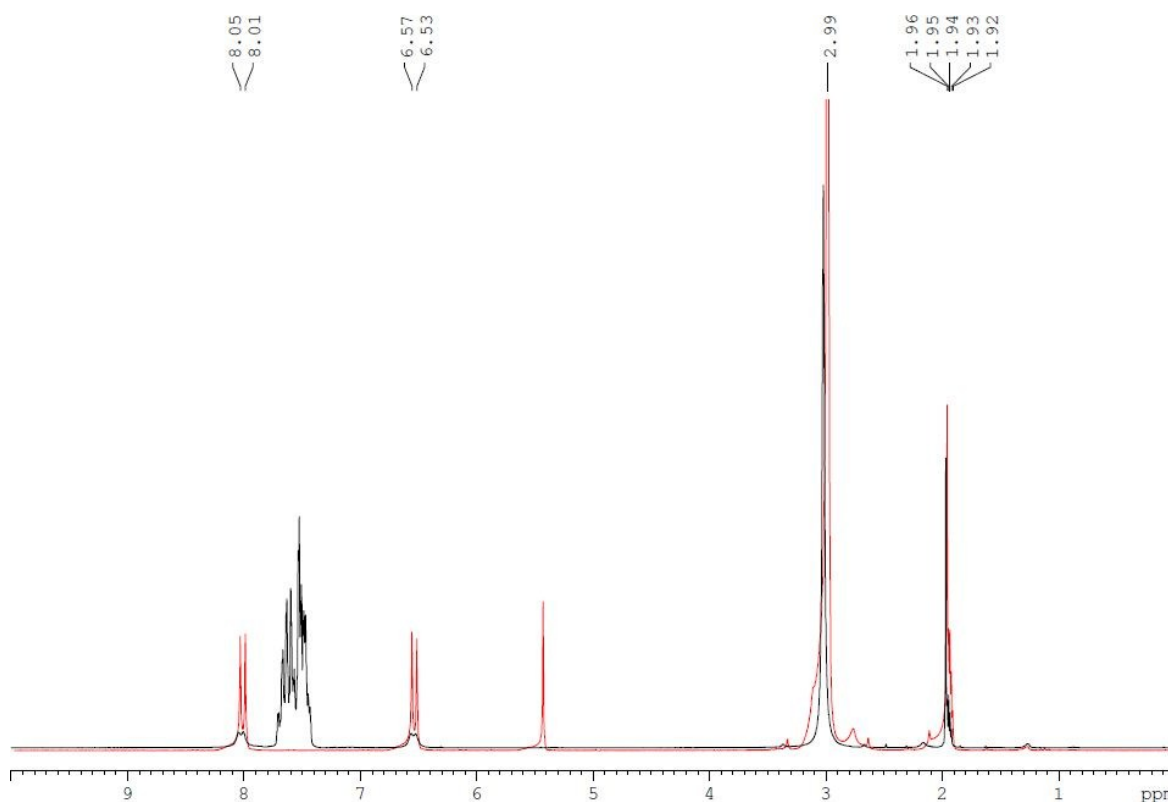

**Fig. S12**  $^1\text{H}$  NMR (199.87 MHz, 295.0 K,  $\text{CD}_3\text{CN}$ ) spectra of  $[\text{Cu}_4(\mathbf{1})_2](\text{BF}_4)_4 \cdot 2\text{CH}_3\text{CN}$  before (red) and after (black) the addition of PPNCl.

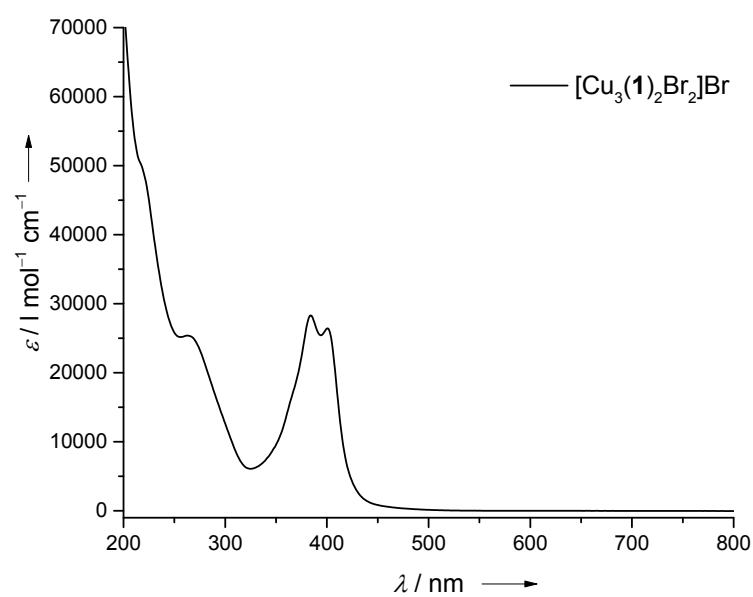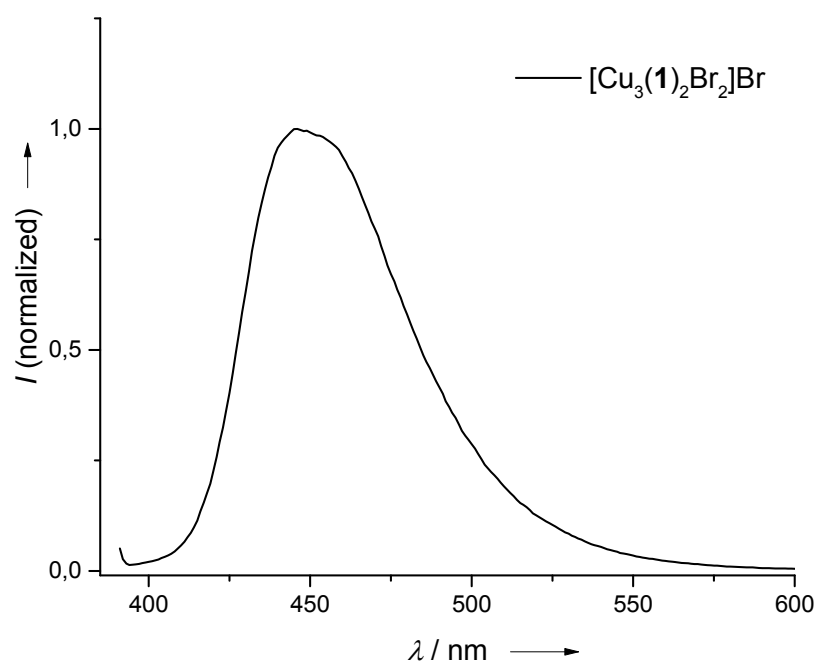

**Fig. S13** Top: UV/Vis spectra of  $[\text{Cu}_3(\mathbf{1})_2\text{Br}_2]\text{Br}$  in  $\text{CH}_3\text{CN}$  ( $c = 1.0 \cdot 10^{-5} \text{ mol l}^{-1}$ ). Bottom: Normalized emission spectra of  $[\text{Cu}_3(\mathbf{1})_2\text{Br}_2]\text{Br}$  in  $\text{CH}_3\text{CN}$  ( $c = 1.0 \cdot 10^{-5} \text{ mol l}^{-1}$ ).

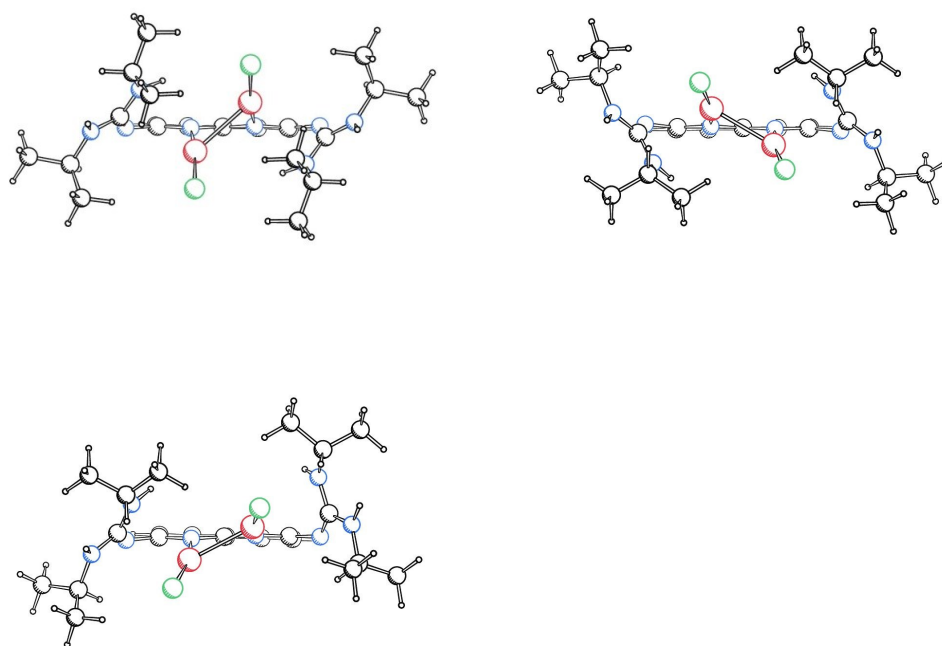

**Fig. S14** Visualization of calculated minimum structures of  $[(\mathbf{CuCl})_2\mathbf{3}]$  (B3LYP/SV(P)).

**Table S1** Comparison of experimental and calculated bond distances (in Å) and angles (in °) for  $[\text{Cu}_4(\mathbf{1})_2]^{4+}$  and  $[\text{Cu}_4(\mathbf{1})_2(\text{CH}_3\text{CN})_2]^{4+}$  (B3LYP/SV(P)).

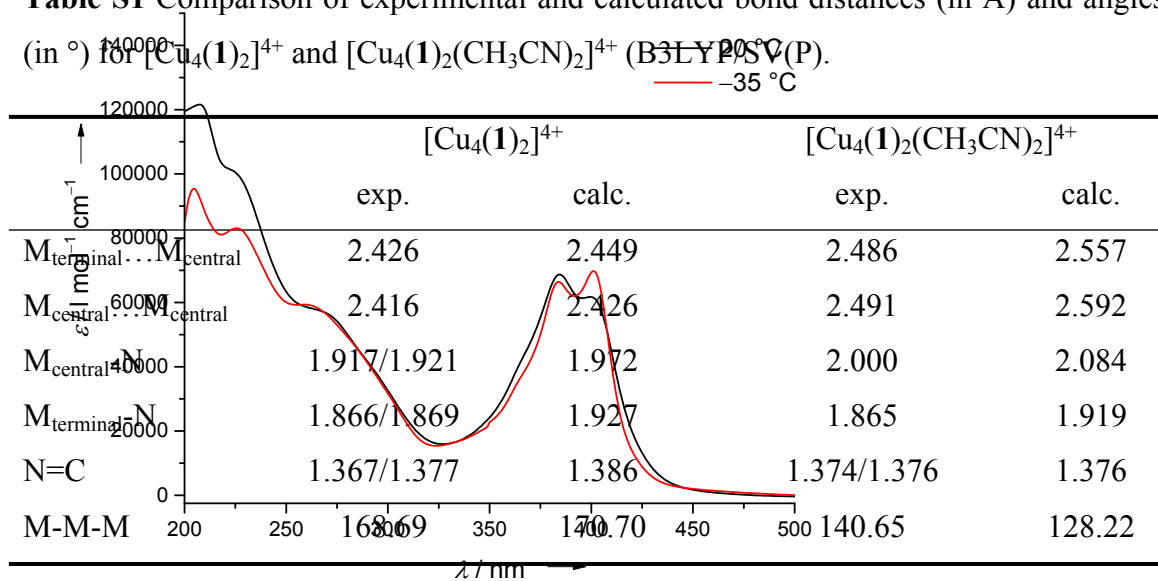

**Fig. S15** UV/Vis spectra of  $[\text{Cu}_4(\mathbf{1})_2](\text{BF}_4)_4$  in  $\text{CH}_3\text{CN}$  solution at 20 °C and -35 °C.

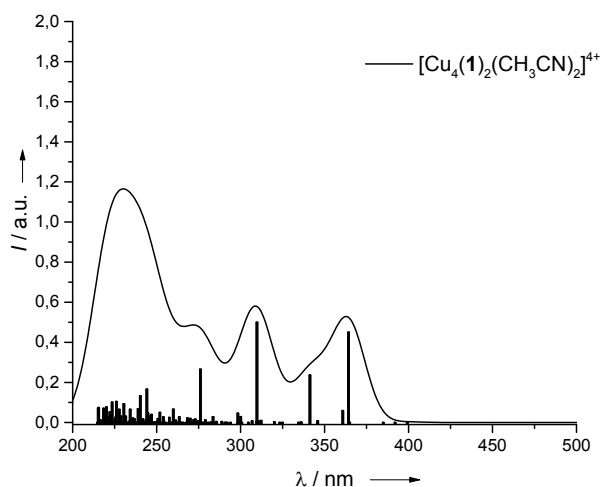

**Fig. S16** Theoretical UV/Vis spectrum from TD-DFT calculations (B3LYP/def2-SV(P)) for  $[Cu_4(\mathbf{1})_2(CH_3CN)_2]^{4+}$ . The spectrum was simulated with Gaussian functions of a half-width of 20 nm.

## Experimental details

### III) Catalysis

#### *1-benzyl-4-phenyl-1H-1,2,3-triazole*

5.9 mg (4.2  $\mu$ mol, 1.0 mol%)  $[Cu_4(\mathbf{1})_2](BF_4)_4 \cdot 2CH_3CN$  were dissolved in 0.5 ml *d6*-DMSO. 50  $\mu$ l (0.46 mmol, 1.04 eq) phenylacetylene and 55  $\mu$ l (0.44 mmol, 1.0 eq) benzyl azide were added. The solution was stirred overnight.  $^1H$  NMR showed complete reaction. The NMR spectrum is shown in Fig. S17.  $^1H$  NMR (199.87 MHz, *d6*-DMSO, 295.0 K):  $\delta$  = 5.61 (s, 2 H,  $-CH_2-$ ), 7.24-7.43 (m, 8 H,  $CH_{arom.}$ ), 7.82 (d,  $J$  = 6.86 Hz, 2 H,  $CH_{arom.}$ ) ppm, 8.60 (s, 1H,  $-CH-$ ).

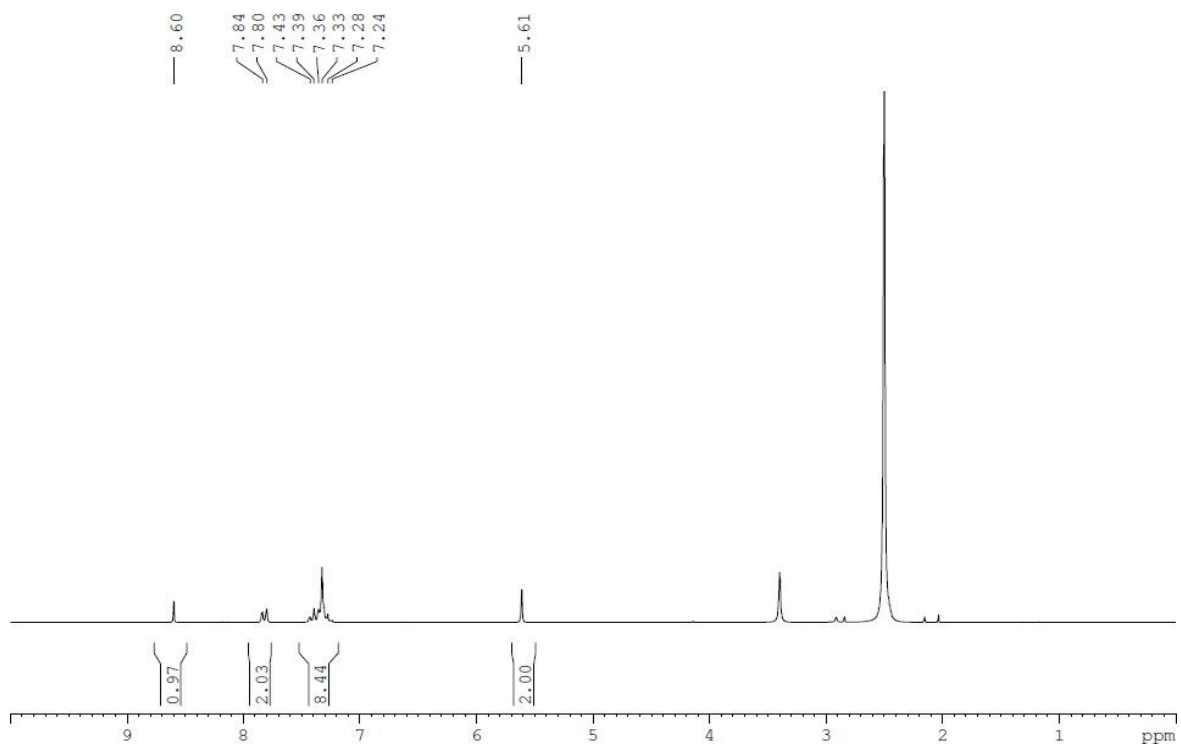

**Fig. S17**  $^1\text{H}$  NMR (199.87 MHz, 295.0 K) spectrum of 1-benzyl-4-phenyl-1*H*-1,2,3-triazole in  $d_6$ -DMSO.



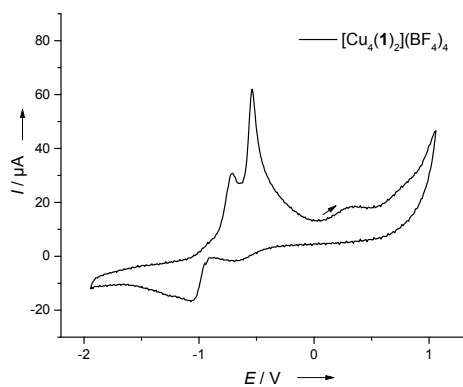

**Fig. S18** CV of  $[\text{Cu}_4(\mathbf{1})_2](\text{BF}_4)_4$  (potential vs  $\text{Fc}/\text{Fc}^+$ ,  $\text{CH}_3\text{CN}$  solution, with  $[n\text{-Bu}_4\text{N}][\text{PF}_6]$  as supporting electrolyte, scan speed of  $500 \text{ mV s}^{-1}$ ).

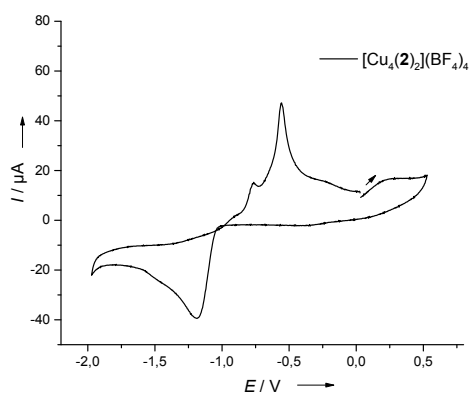

**Fig. S19** CV of  $[\text{Cu}_4(\mathbf{2})_2](\text{BF}_4)_4$  (potential vs  $\text{Fc}/\text{Fc}^+$ ,  $\text{CH}_3\text{CN}$  solution, with  $[n\text{-Bu}_4\text{N}][\text{PF}_6]$  as supporting electrolyte, scan speed of  $500 \text{ mV s}^{-1}$ ).

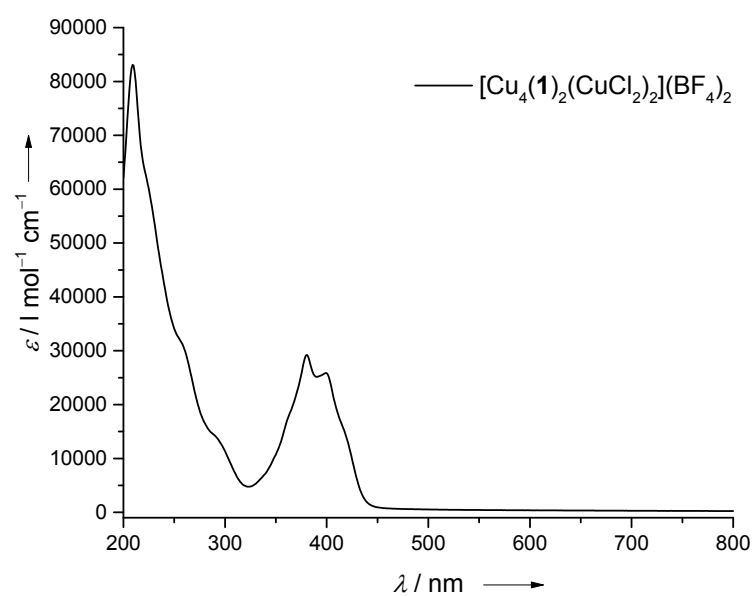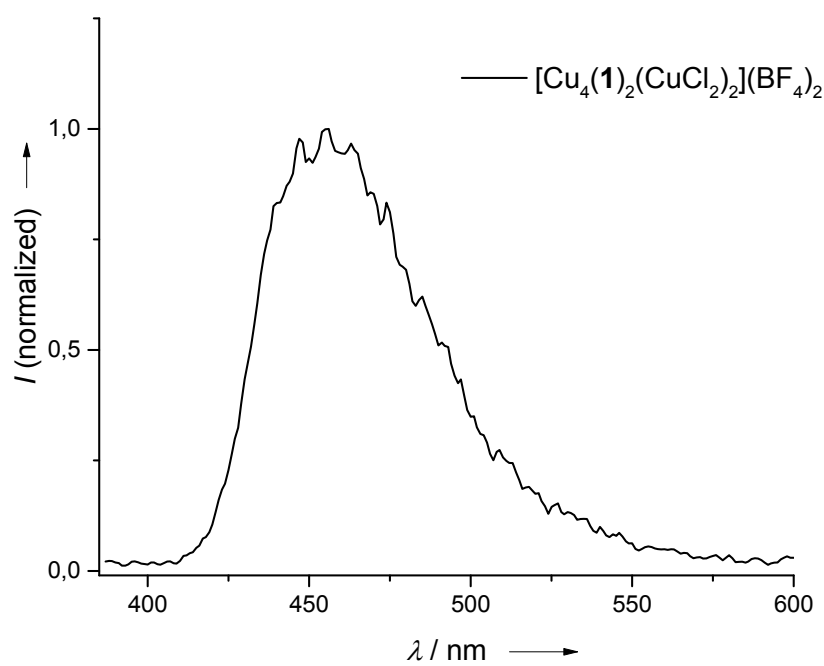

**Fig. S20** Top: UV/Vis spectra of  $[\text{Cu}_4(\mathbf{1})_2(\text{CuCl}_2)_2](\text{BF}_4)_2$  in  $\text{CH}_3\text{CN}$  ( $c = 1.2 \cdot 10^{-5} \text{ mol l}^{-1}$ ). Bottom: Normalized emission spectra of  $[\text{Cu}_4(\mathbf{1})_2(\text{CuCl}_2)_2](\text{BF}_4)_2$  in  $\text{CH}_3\text{CN}$  ( $c = 1.2 \cdot 10^{-5} \text{ mol l}^{-1}$ ).

## Experimental details

### IV) Oxidation of $[\text{Cu}_4(\mathbf{1})_2](\text{BF}_4)_4 \cdot 2\text{CH}_3\text{CN}$

a) 22.2 mg (0.02 mmol, 1.0 eq)  $[\text{Cu}_4(\mathbf{1})_2](\text{BF}_4)_4 \cdot 2\text{CH}_3\text{CN}$  was dissolved in 4 ml  $\text{CH}_3\text{CN}$ . 9.28 mg (0.04 mmol, 2.0 eq) ferrocenium tetrafluoroborate were added. The solution was stirred for 4 h at room temperature. Then, the solution was removed under reduced pressure. No reaction observed. The reaction was repeated heating the solution at reflux for 3.5 h. Also this time no reaction took place.

b) 15.3 mg (0.01 mmol, 1.0 eq)  $[\text{Cu}_4(\mathbf{1})_2](\text{BF}_4)_4 \cdot 2\text{CH}_3\text{CN}$  was dissolved in 3 ml  $\text{CH}_3\text{CN}$ . 2.70 mg (0.02 mmol, 2.0 eq) benzoquinone were added. The solution was first stirred for 1 h at room temperature, then 1.5 h at 50 °C and finally at 80 °C overnight. Afterwards, the solvent was removed in vacuo receiving a brownish solid. No reaction observed in  $^1\text{H}$  NMR spectrum.

c) 17.9 mg (0.01 mmol, 1.0 eq)  $[\text{Cu}_4(\mathbf{1})_2](\text{BF}_4)_4 \cdot 2\text{CH}_3\text{CN}$  was dissolved in 5 ml  $\text{CH}_3\text{CN}$  and cooled down to -35 °C. Then a solution of 1.5 mg (0.01 mmol, 1.0 eq)  $\text{NOBF}_4$  in 2 ml  $\text{CH}_3\text{CN}$  was added dropwise. Thereby the solution turned colorless. After the addition was completed, the solution was stirred for 1 h at -35 °C and the solution turned slightly green. Finally, the solid was removed in vacuo. Analysis showed decomposition of the compound.

d) 20.0 mg (0.01 mmol, 1.0 eq)  $[\text{Cu}_4(\mathbf{1})_2](\text{BF}_4)_4 \cdot 2\text{CH}_3\text{CN}$  were dissolved in 4.5 ml  $\text{CH}_3\text{CN}$ . A solution of 5.6 mg (0.03 mmol, 2.0 eq) solved in 2.5 ml  $\text{CH}_3\text{CN}$  were added dropwise. The solution was stirred for 30 min at room temperature. After 2 min of stirring, the color of the solution turned from yellow to colorless. After 30 min, the solvent was removed under reduced pressure and a slightly yellow solid was obtained. NMR analysis showed decomposition of the compound.

### V) Reaction of KCl/CuCl with $[\text{Cu}_4(\mathbf{1})_2](\text{BF}_4)_4 \cdot 2\text{CH}_3\text{CN}$

15.2 mg (0.01 mmol, 1.0 eq)  $[\text{Cu}_4(\mathbf{1})_2](\text{BF}_4)_4 \cdot 2\text{CH}_3\text{CN}$ , 1.70 mg (0.02 mmol, 2.0 eq) KCl and 2.20 mg (0.02 mmol, 2.0 eq) CuCl were suspended in 4 ml  $\text{CH}_3\text{CN}$ . The reaction mixture was stirred overnight at 75 °C. After cooling to room temperature, the solvent was removed in vacuo. The obtained yellow solid was redissolved in  $\text{CH}_2\text{Cl}_2$  in order to grow crystals,

insoluble solid was filtered off. However, no crystals were received and further analytical data showed that no reaction has occurred.

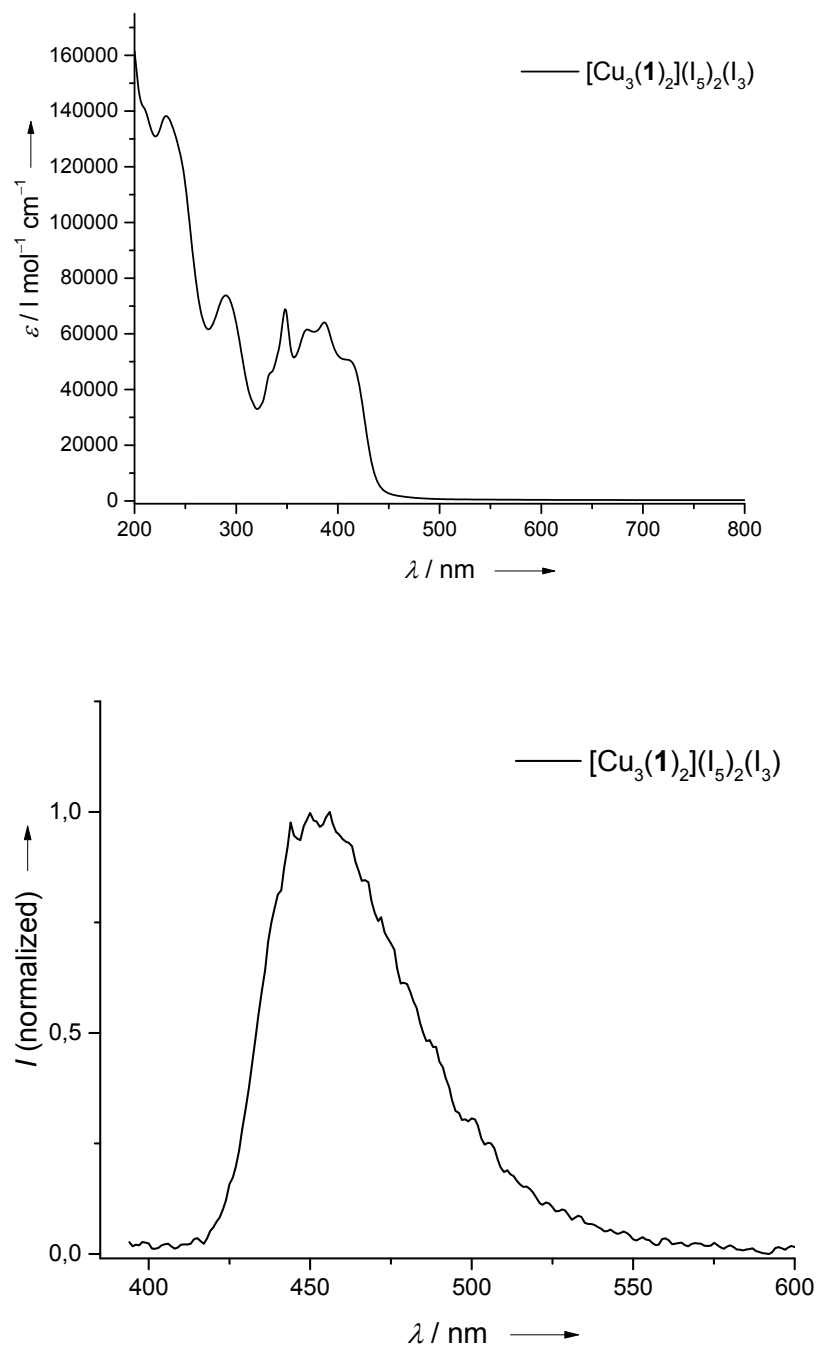

**Fig. S21** Top: UV/Vis spectra of  $[\text{Cu}_3(\mathbf{1})_3](\text{I}_5)_2(\text{I}_3)$  in  $\text{CH}_3\text{CN}$  ( $c = 1.1 \cdot 10^{-5} \text{ mol l}^{-1}$ ). Bottom: Normalized emission spectra of  $[\text{Cu}_3(\mathbf{1})_3](\text{I}_5)_2(\text{I}_3)$  in  $\text{CH}_3\text{CN}$  ( $c = 1.1 \cdot 10^{-5} \text{ mol l}^{-1}$ ).

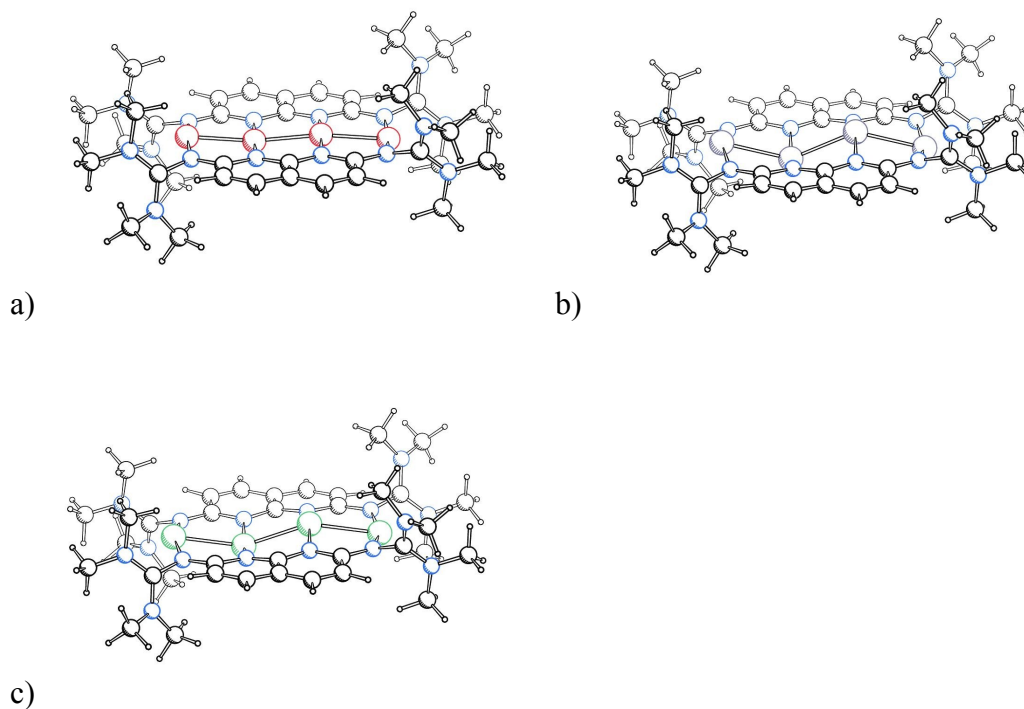

**Fig. S22** Calculated minimum structures of a)  $[\text{Cu}_4(\mathbf{1})_2]^{4+}$ , b)  $[\text{Ag}_4(\mathbf{1})_2]^{4+}$  and c)  $[\text{Au}_4(\mathbf{1})_2]^{4+}$  (B3LYP/SV(P)).

### Quantum chemical calculations

TD-DFT calculations were performed for  $[\text{Ag}_4(\mathbf{1})_2]^{4+}$  and  $[\text{Au}_4(\mathbf{1})_2]^{4+}$  to investigate, if the type of the metal atoms of the tetranuclear complex has influence on the electronic excitations. In particular, we were interested, if the exchange of the metal leads to a change of the nature of the low-lying transitions. The spectra are shown in Fig. S23. For  $[\text{Ag}_4(\mathbf{1})_2]^{4+}$ , the two strong low-lying transitions are found at 350.5 and 343.4 nm, they are blue-shifted by 10 and 5 nm with respect to the  $[\text{Cu}_4(\mathbf{1})_2]^{4+}$  positions. These are HOMO-1  $\rightarrow$  LUMO and HOMO  $\rightarrow$  LUMO+1 transitions, and the orbitals again are combinations of the HOMOs or the LUMOs of the two ligands. The orbitals are shown in Fig. S24. For  $[\text{Au}_4(\mathbf{1})_2]^{4+}$ , there are two strong low-lying transitions at 360.4 nm and 328.5 nm. These are transitions from the HOMO-1 to LUMO+1 and from the HOMO to LUMO+5 orbitals. The former transition again is a ligand centered transition involving essentially combinations of the HOMOs and LUMOs of the two ligands. However, the latter transition is a transition similar to the

transition of  $[\text{Cu}_4(\mathbf{1})_2]^{4+}$  at 293 nm, involving the Au d orbitals. The orbitals are shown in Fig. S25. Thus for Au complex, the first strong transition involving the d orbitals is found distinctly red-shifted (35 nm) compared to the Cu complex. Interestingly, for the Ag complex there is no corresponding low-lying transition involving the d orbitals with a sizeable intensity.

**Table S2** Selected calculated bond distances (in Å) and angles (in °) for  $[\text{Cu}_4(\mathbf{1})_2]^{4+}$ ,  $[\text{Ag}_4(\mathbf{1})_2]^{4+}$  and  $[\text{Au}_4(\mathbf{1})_2]^{4+}$  (B3LYP/SV(P)).

|                                                | $[\text{Cu}_4(\mathbf{1})_2]^{4+}$ | $[\text{Ag}_4(\mathbf{1})_2]^{4+}$ | $[\text{Au}_4(\mathbf{1})_2]^{4+}$ |
|------------------------------------------------|------------------------------------|------------------------------------|------------------------------------|
| $M_{\text{terminal}} \dots M_{\text{central}}$ | 2.449                              | 2.696                              | 2.684                              |
| $M_{\text{central}} \dots M_{\text{central}}$  | 2.426                              | 2.664                              | 2.633                              |
| $M_{\text{central}}\text{-N}$                  | 1.972                              | 2.226                              | 2.156                              |
| $M_{\text{terminal}}\text{-N}$                 | 1.927                              | 2.181                              | 2.151                              |
| N=C                                            | 1.386                              | 1.380                              | 1.392                              |
| M-M-M                                          | 170.70                             | 142.39                             | 152.92                             |

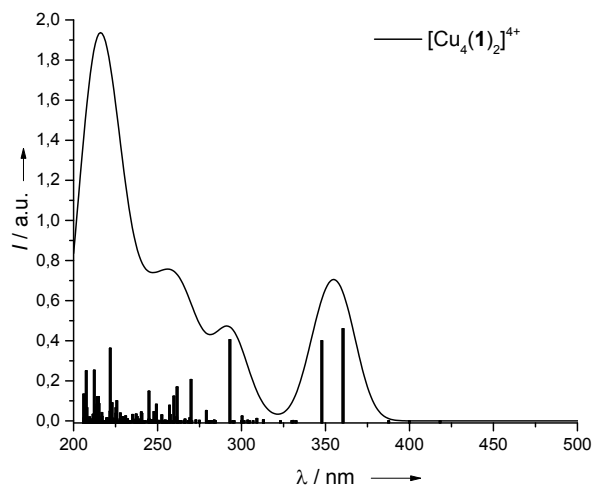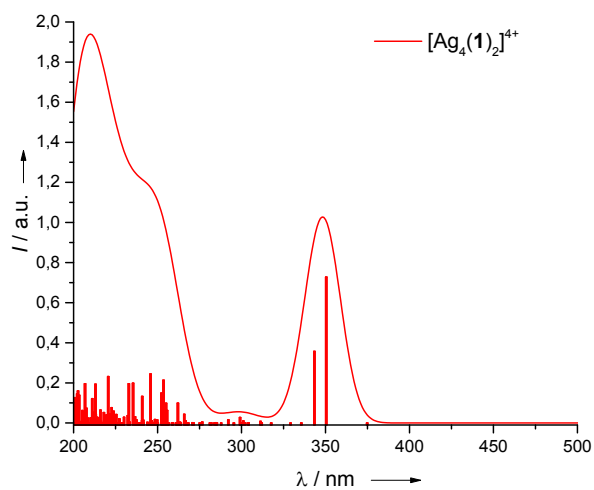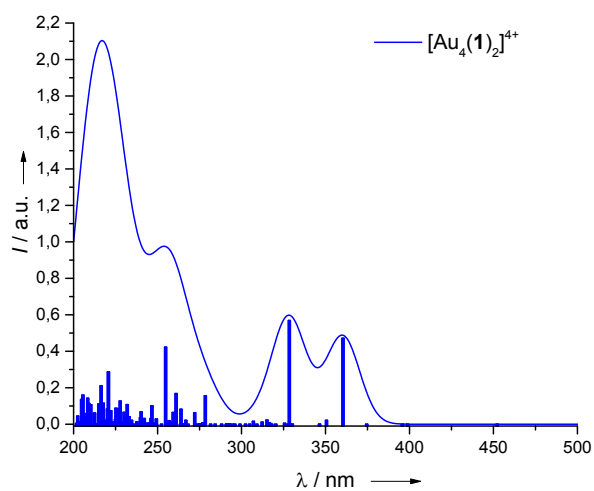

**Fig. S23** Theoretical UV/Vis spectrum from TD-DFT calculations (B3LYP/def2-SV(P)) for  $[\text{Cu}_4(\mathbf{1})_2]^{4+}$  (top),  $[\text{Ag}_4(\mathbf{1})_2]^{4+}$  (center) and  $[\text{Au}_4(\mathbf{1})_2]^{4+}$  (bottom). Data was fitted as Gaussian curve with a half-width of 20 nm.

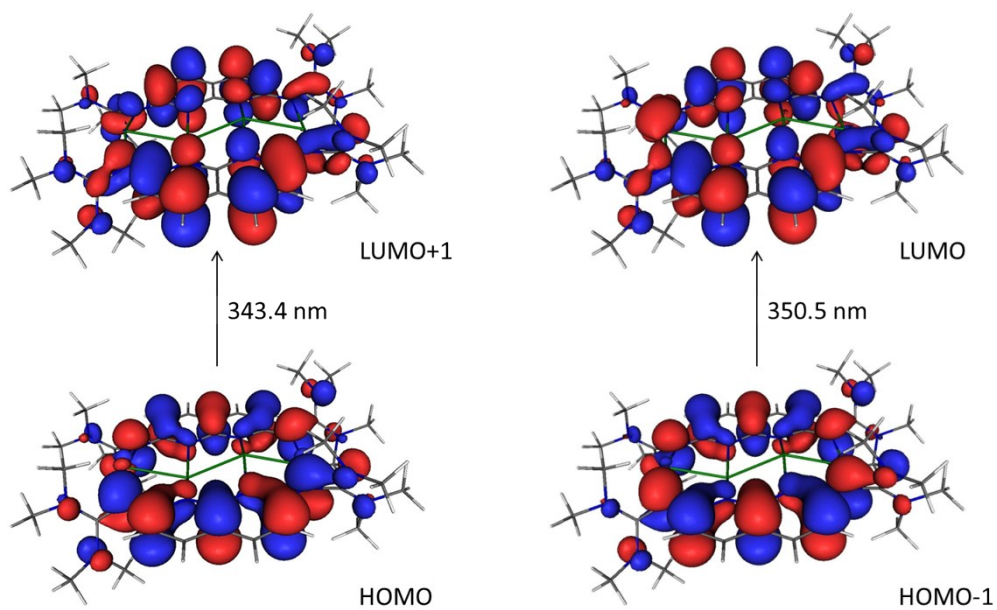

**Fig. S24** Visualization of isodensity surfaces of orbitals of  $[\text{Ag}_4(\mathbf{1})_2]^{4+}$  involved in the electronic transitions.

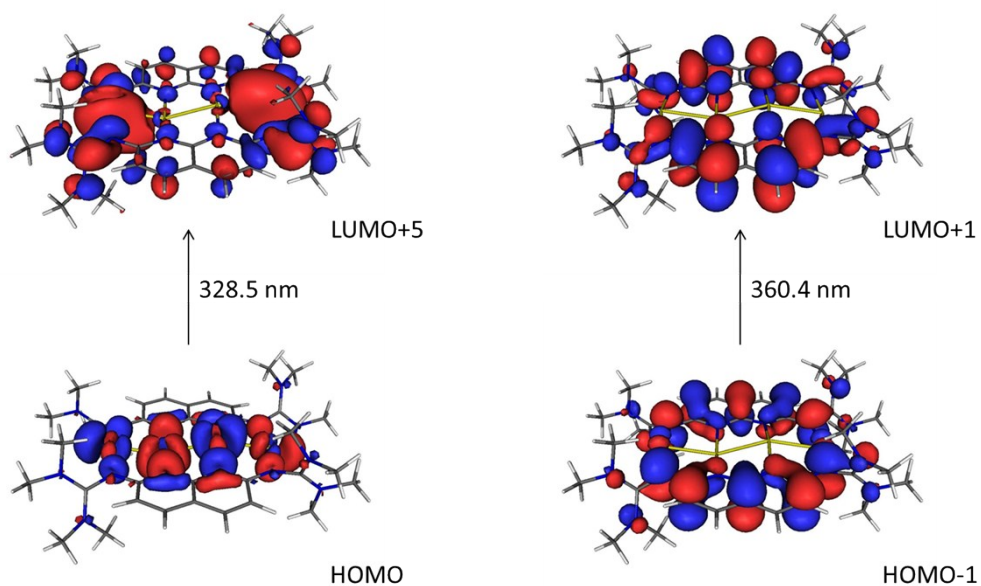

**Fig. S25** Visualization of isodensity surfaces of orbitals of  $[\text{Au}_4(\mathbf{1})_2]^{4+}$  involved in the electronic transitions.
